# Supplementary material for: Enhancing near-infrared photoluminescence from single-walled carbon nanotubes by defect-engineering using benzoyl peroxide
Source: PubMed Central journal article supplement (PMC7669876; doi:10.1038/s41598-020-76716-9), 2020-11-16
Supplement: 41598_2020_76716_MOESM1_ESM.pdf [file 41598_2020_76716_MOESM1_ESM.pdf]

## Supplementary Information

# Enhancing near-infrared photoluminescence from single-walled carbon nanotubes by defect-engineering using benzoyl peroxide

Lukasz Przypis<sup>a</sup>, Maciej Krzywiecki<sup>b</sup>, Yoshiaki Niidome<sup>c</sup>,  
Haruka Aoki<sup>c</sup>, Tomohiro Shiraki<sup>c</sup>, Dawid Janas<sup>a,\*</sup>

<sup>a</sup> Department of Organic Chemistry, Bioorganic Chemistry and Biotechnology, Silesian University of Technology, B. Krzywoustego 4, 44-100 Gliwice, Poland

<sup>b</sup> Institute of Physics-CSE, Silesian University of Technology, Konarskiego 22B, 44-100 Gliwice, Poland

<sup>c</sup> Department of Applied Chemistry, Graduate School of Engineering, Kyushu University, 744 Motooka, Nishi-ku, 819-0395 Fukuoka, Japan

\*Corresponding author: Dawid.Janas@polsl.pl

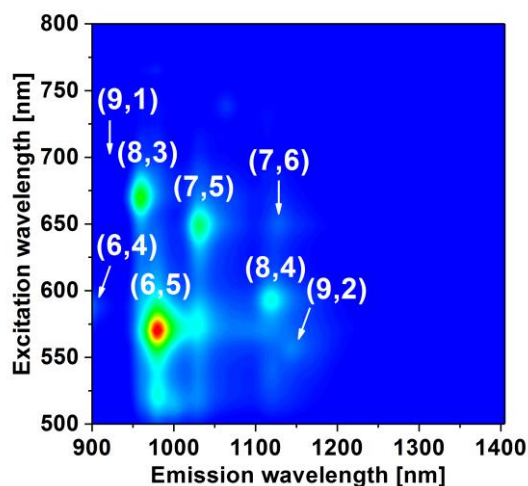

**Figure S1** 2D PLE map of (6,5)-enriched SWCNTs dispersed in 2% sodium cholate aqueous solution.

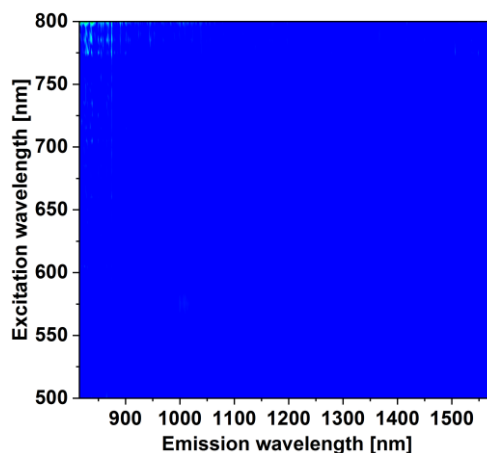

**Figure S2** 2D PLE map of (6,5)-enriched SWCNTs dispersed in 2% sodium cholate aqueous solution after treatment with BPO at 100°C for 1h in water.

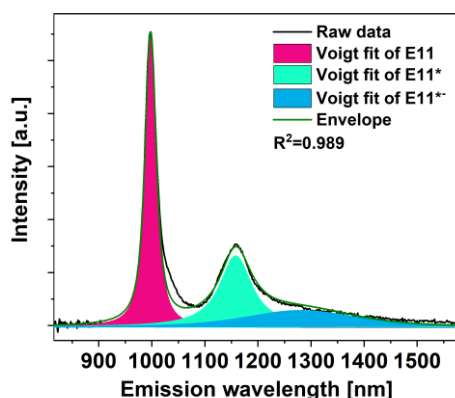

**Figure S3** Deconvolution of an exemplary PL spectrum of (6,5) SWCNT dispersion in PFO-Bpy/toluene solution after the treatment with BPO at 60  $\mu\text{g}/\text{mL}$  at 100°C for 1h. Voigt profile was utilized for the resolution of the E<sub>11</sub>, E<sub>11</sub><sup>\*</sup>, and E<sub>11</sub><sup>\*-</sup> signatures. The integrated area under these curves was used for analysis in Figs. 5b, 6b-c.

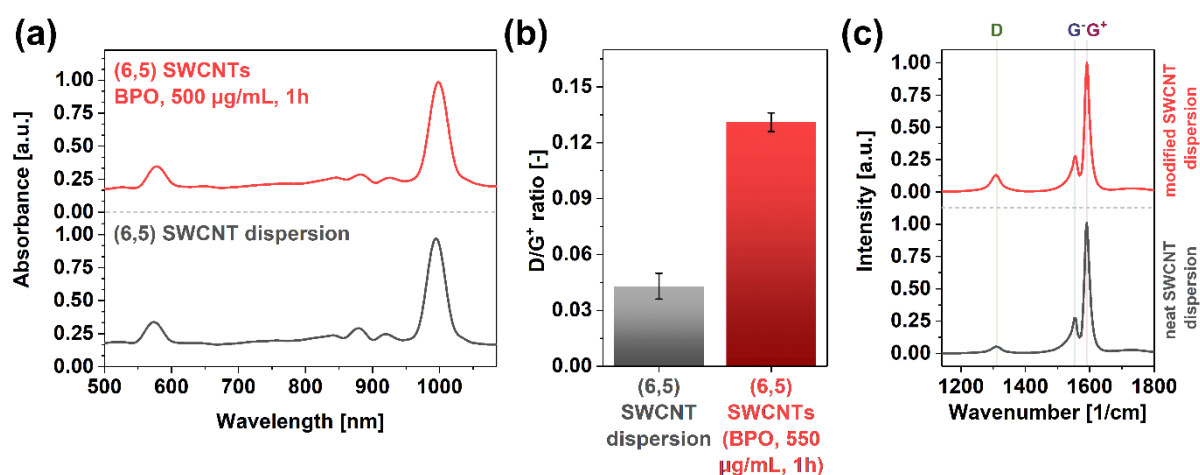

**Figure S4** (a) Absorption spectra of (6,5) SWCNT dispersion in PFO-Bpy/toluene solution before (grey line) and after the treatment with BPO at 500  $\mu\text{g}/\text{mL}$  at 100°C for 1h (red line). (b) D/G<sup>+</sup> ratios measured by Raman spectroscopy and (c) corresponding Raman spectra.

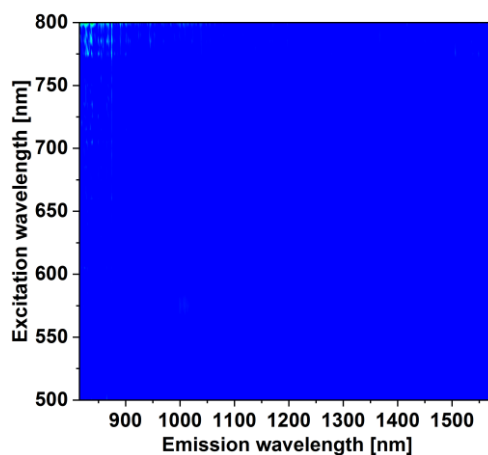

**Figure S5** 2D PLE map of BPO in PFO-Bpy and toluene mixture in the absence of SWCNTs.
